# Supplementary material for: Determination of element–deuterium bond lengths in Zintl phase deuterides by2H-NMR
Source: Royal Society of Chemistry journal article supplement (doi:10.1039/c9cp00292h), 2019-01-01
Supplement: c9cp00292h1.pdf [file c9cp00292h1.pdf]

# Determination of element-deuterium bond lengths in Zintl phase hydrides by $^2\text{H}$ -NMR

Robin Guehne,<sup>†,‡</sup> Henry Auer,<sup>\*,¶</sup> Holger Kohlmann,<sup>¶</sup> Jürgen Haase,<sup>†</sup> and Marko Bertmer<sup>\*,†</sup>

<sup>†</sup>*Felix Bloch Institute, Leipzig University, Linnéstrasse 5, 04103 Leipzig, Germany*

<sup>‡</sup>*MacDiarmid Institute, School of Chemical and Physical Sciences, Victoria University of Wellington, PO Box 600, Wellington 6140, New Zealand*

<sup>¶</sup>*Department of Inorganic Chemistry, Leipzig University, Johannisallee 29, 04103 Leipzig, Germany*

E-mail: henry.auer@uni-leipzig.de; bertmer@physik.uni-leipzig.de

Supplementary information to the publication in  
*Phys. Chem. Chem. Phys.* **2019**,

## Contents

|                                                                             |   |
|-----------------------------------------------------------------------------|---|
| Dependency of $C_Q$ regarding the dihedral Si-chain to D angle              | 2 |
| Evaluation of Si-D bond lengths from experimental $C_Q$ values              | 3 |
| Evaluation of Ge-D bond lengths from experimental $C_Q$ values              | 5 |
| Sn-D: $C_Q$ -distance dependency according to $\text{SnD}_4$ model          | 6 |
| $^2\text{H}$ MAS spectra at slow spinning showing spinning sideband pattern | 7 |

# Dependency of $C_Q$ regarding the dihedral Si-chain to D angle

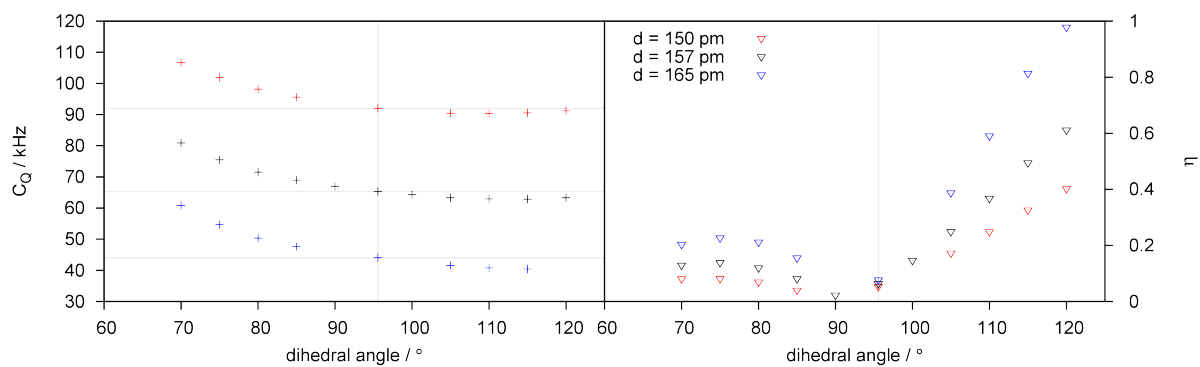

Figure S1: Changes of  $C_Q$  and  $\eta$  regarding to the dihedral angle of the plane of the Si zig-zag chain towards deuterium. The  $\text{BaSiD}_2$ -structure was used as a model system. Results are shown for the DFT-optimised bond length  $d(\text{Si-D}) = 157$  pm and two additional values. The DFT-optimised structure exhibits a bond angle of  $95.6^\circ$  which is indicated by the grey lines.

# Evaluation of Si-D bond lengths from experimental $C_Q$ values

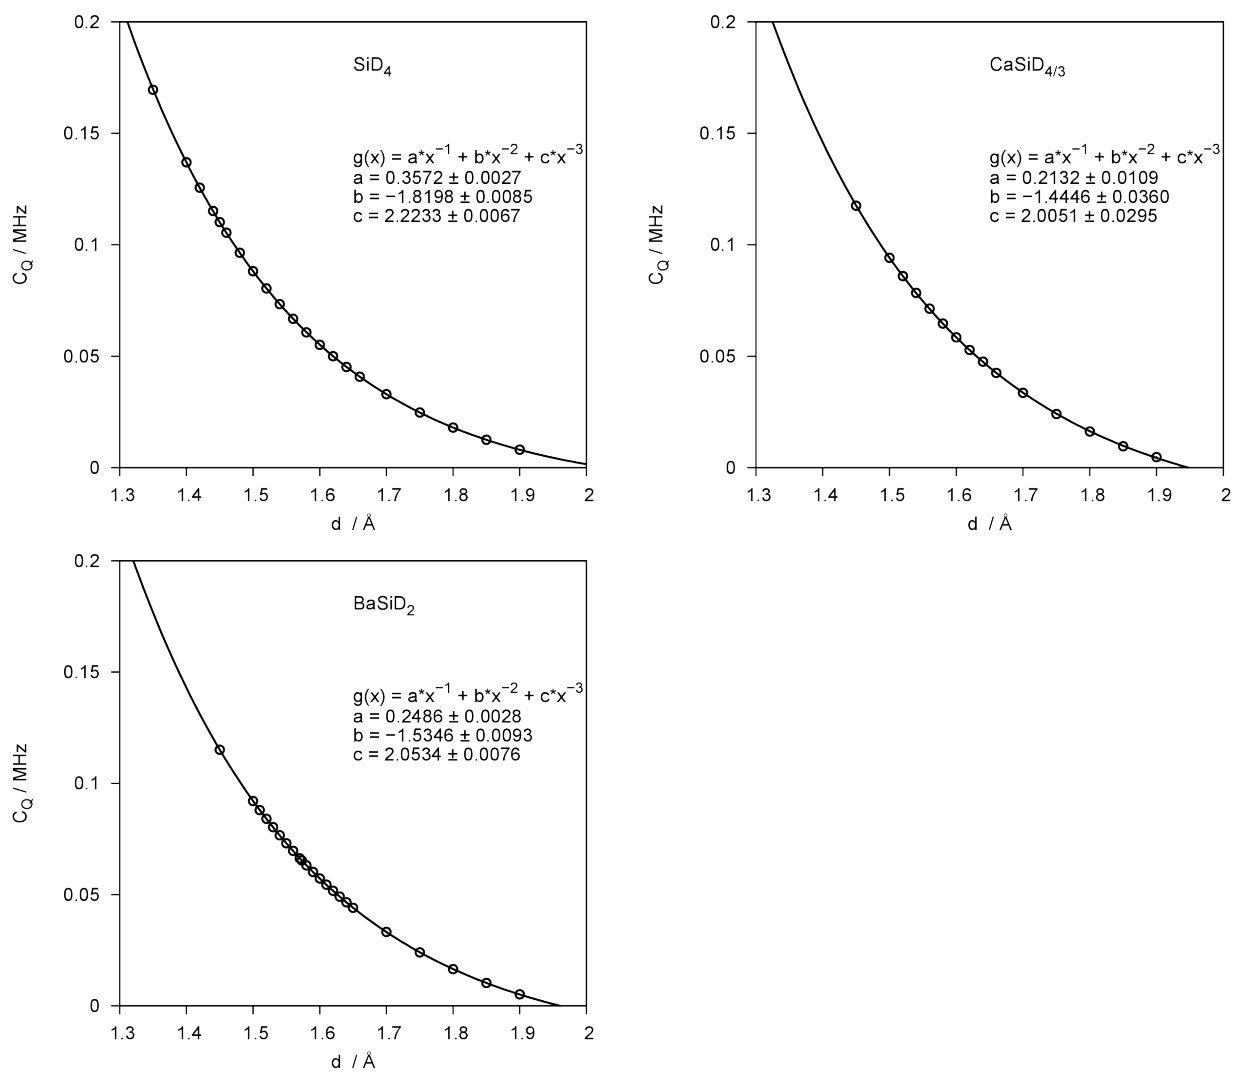

Figure S2: Empirical fits to DFT-derived  $C_Q$ -distance curves for the silicon systems.

Table S1: Si-D-distances calculated from experimental  $C_Q$  values using the  $C_Q$ -distance dependencies as given in Fig. S2.

| compound                                       | $C_{Q,\text{exp}} / \text{kHz}$ | $d_{\text{calc}}(\text{Si-D}) / \text{\AA}$ |                             |                           | $d_{\text{exp}}(\text{Si-D})$  |
|------------------------------------------------|---------------------------------|---------------------------------------------|-----------------------------|---------------------------|--------------------------------|
|                                                |                                 | SiD <sub>4</sub> -model                     | CaSiD <sub>4/3</sub> -model | BaSiD <sub>2</sub> -model |                                |
| CaSiD <sub>4/3-x</sub>                         | 69(1)                           | 1.552(3)                                    | 1.566(3)                    | 1.562(3)                  |                                |
| SrSiD <sub>5/3-x</sub>                         | 63(1)                           | 1.572(4)                                    | 1.584(3)                    | 1.581(4)                  |                                |
|                                                | 78(3)                           | 1.526(8)                                    | 1.540(8)                    | 1.536(8)                  |                                |
| BaSiD <sub>2-x</sub>                           | 58(2)                           | 1.589(7)                                    | 1.601(7)                    | 1.597(7)                  |                                |
| SiD <sub>4</sub>                               | 95 <sup>1</sup>                 | 1.482                                       | 1.497                       | 1.493                     | 1.473-1.492 <sup>a</sup>       |
| CH <sub>3</sub> SiD <sub>3</sub>               | 90(2) <sup>4</sup>              | 1.494(5)                                    | 1.509(5)                    | 1.505(5)                  | 1.473-1.492 <sup>a</sup>       |
| C <sub>6</sub> D <sub>5</sub> SiD <sub>3</sub> | 91(2) <sup>5</sup>              | 1.492(5)                                    | 1.507(5)                    | 1.502(4)                  | 1.473-1.492 <sup>a</sup>       |
| $\beta$ -KSiD <sub>3</sub>                     | 72.0(5) <sup>6</sup>            | 1.543(2)                                    | 1.557(2)                    | 1.553(2)                  | 1.537(8)-1.545(6) <sup>7</sup> |

<sup>a</sup>Typical bond lengths. Determined for disilane (Si<sub>2</sub>H<sub>6</sub>).<sup>2,3</sup>

# Evaluation of Ge-D bond lengths from experimental $C_Q$ values

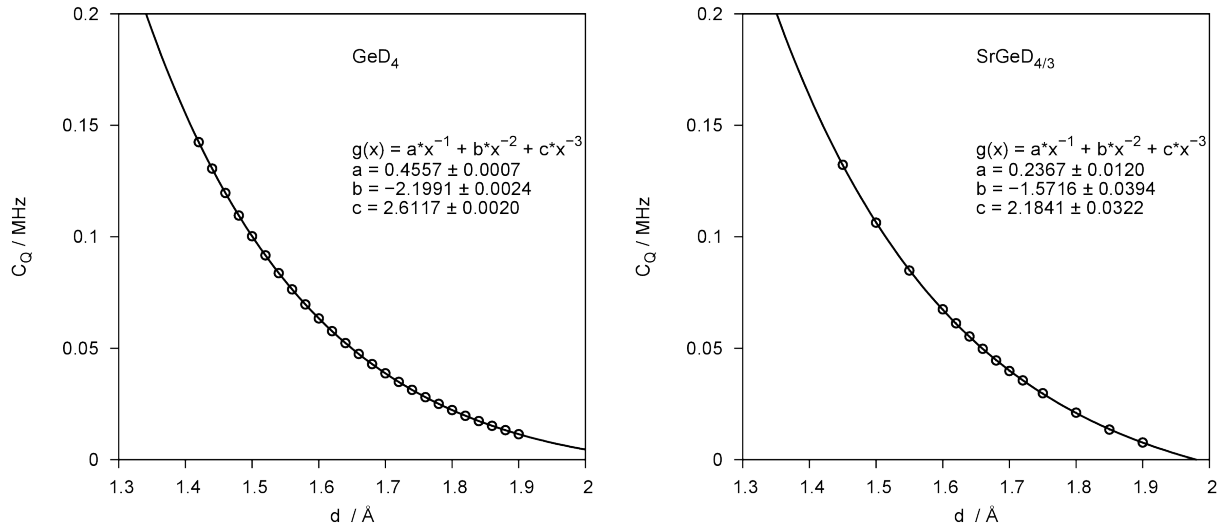

Figure S3: Empirical fits to DFT-derived  $C_Q$ -distance curves for the germanium systems.

Table S2: Ge-D-distances calculated from experimental  $C_Q$  values using the  $C_Q$ -distance dependencies as given in Fig. S3.

| compound                         | $C_{Q,\text{exp}} / \text{kHz}$ | $d_{\text{calc}}(\text{Ge-D}) / \text{\AA}$ |                             | $d_{\text{exp}}(\text{Ge-D})$ |
|----------------------------------|---------------------------------|---------------------------------------------|-----------------------------|-------------------------------|
|                                  |                                 | GeD <sub>4</sub> -model                     | SrGeD <sub>4/3</sub> -model |                               |
| SrGeD <sub>4/3-x</sub>           | 52(2)                           | 1.642(8)                                    | 1.652(8)                    |                               |
| BaGeD <sub>5/3-x</sub>           | 51(2)                           | 1.646(8)                                    | 1.659(8)                    |                               |
|                                  | 61(2)                           | 1.609(7)                                    | 1.620(7)                    |                               |
| GeD <sub>4</sub>                 | 82(5) <sup>8</sup>              | 1.545(14)                                   | 1.558(13)                   | 1.517 <sup>9</sup>            |
| CH <sub>3</sub> GeD <sub>3</sub> | 82(2) <sup>10</sup>             | 1.545(7)                                    | 1.558(6)                    | 1.517-1.541 <sup>a</sup>      |

<sup>a</sup>Typical bond lengths. Determined from germane (GeD<sub>4</sub>)<sup>9</sup> and digermane (Ge<sub>2</sub>H<sub>6</sub>).<sup>11</sup>

## Sn-D: $C_Q$ -distance dependency according to $\text{SnD}_4$ model

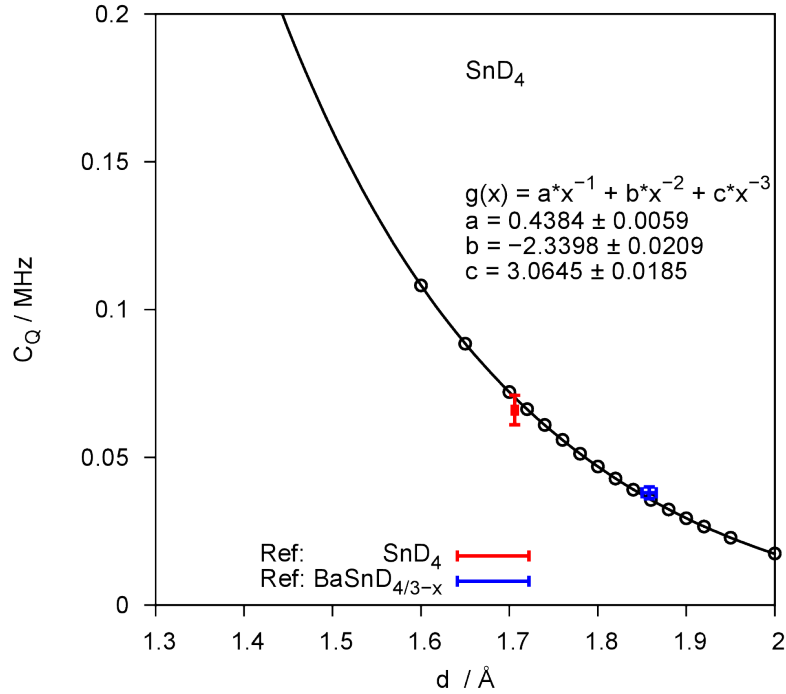

Figure S4: Empirical fit to the DFT-derived  $C_Q$ -distance curve of  $\text{SnD}_4$ . The experimental reference data are:  $\text{SnD}_4$ :  $d(\text{Sn-D}) = 1.706(3) \text{ \AA}$  (at 5 K),<sup>9</sup>  $C_Q = 66(5) \text{ kHz}$ .<sup>12</sup>

$\text{BaSnD}_{4/3-x}$ :  $d(\text{Sn-D}) = 1.858(8) \text{ \AA}$ ,<sup>13</sup>  $C_Q = 38(2) \text{ kHz}$  (this work).

A evaluation of the Sn-D bond length from experimental  $C_Q$ -values according to the empirically fitted curve gives:

$\text{SnD}_4$ :  $d(\text{Sn-D}) = 1.721(18) \text{ \AA}$ .

$\text{BaSnD}_{4/3-x}$ :  $d(\text{Sn-D}) = 1.846(12) \text{ \AA}$ .

## $^2\text{H}$ MAS spectra at slow spinning showing spinning sideband pattern

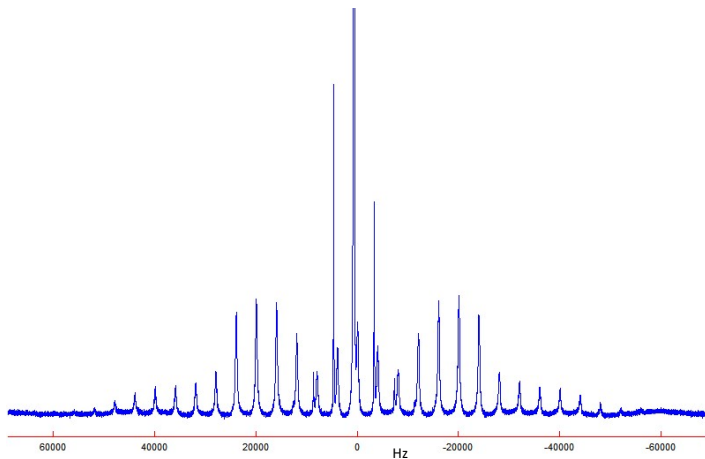

Figure S5:  $^2\text{H}$  MAS spectrum of  $\text{BaSiD}_{2-x}$  recorded with a spinning frequency of 4 kHz. The central line is vertically cut for better visibility of sideband intensities..

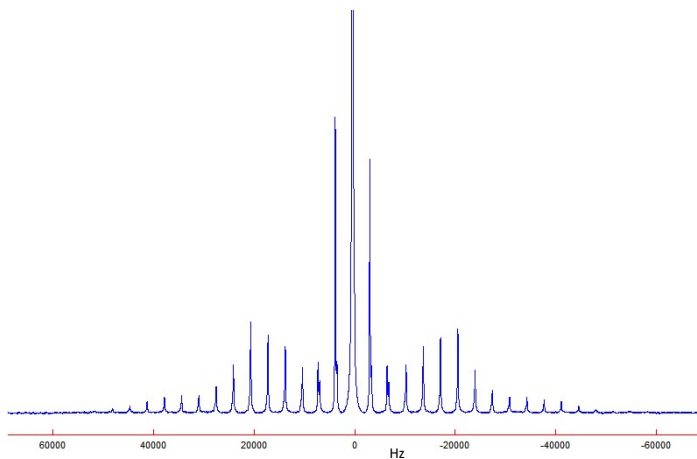

Figure S6:  $^2\text{H}$  MAS spectrum of  $\text{SrSiD}_{5/3-x}$  recorded with a spinning frequency of 3.4 kHz. The central line is vertically cut for better visibility of sideband intensities..

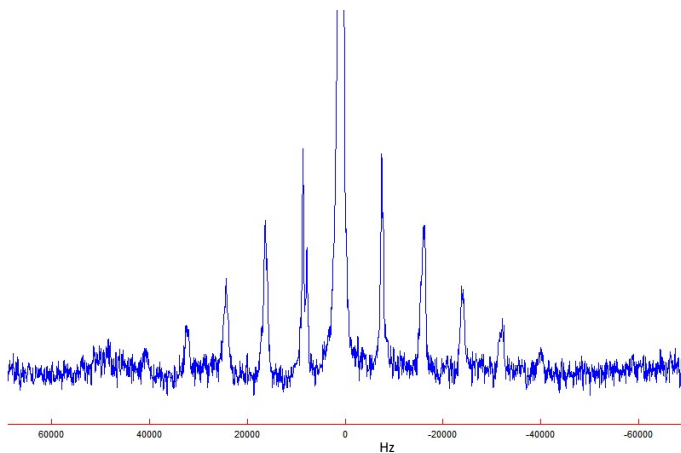

Figure S7:  $^2\text{H}$  MAS spectrum of  $\text{CaSiD}_{4/3-x}$  recorded with a spinning frequency of 8 kHz. The central line is vertically cut for better visibility of sideband intensities..

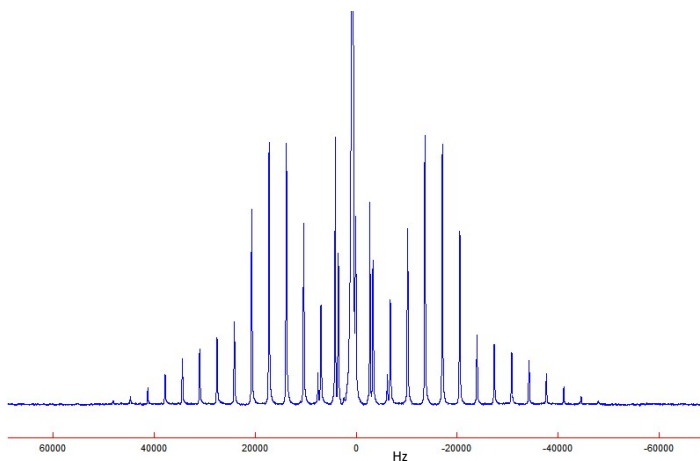

Figure S8:  $^2\text{H}$  MAS spectrum of  $\text{BaGeD}_{5/3-x}$  recorded with a spinning frequency of 3.4 kHz. The central line is vertically cut for better visibility of sideband intensities..



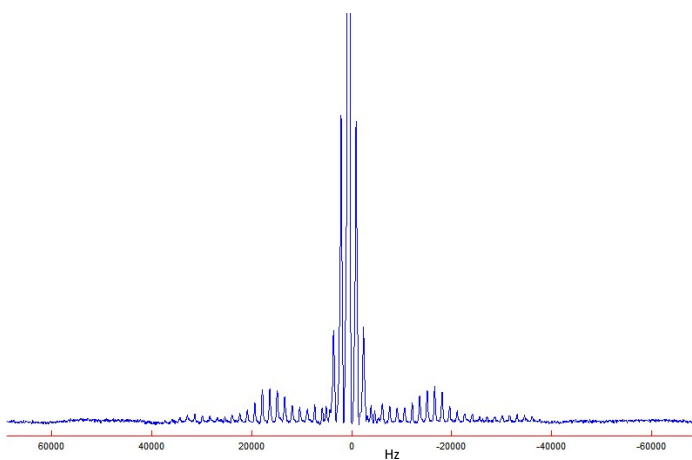

Figure S9:  $^2\text{H}$  MAS spectrum of  $\text{SrGeD}_{4/3-x}$  recorded with a spinning frequency of 1.5 kHz. The central line is vertically cut for better visibility of sideband intensities..

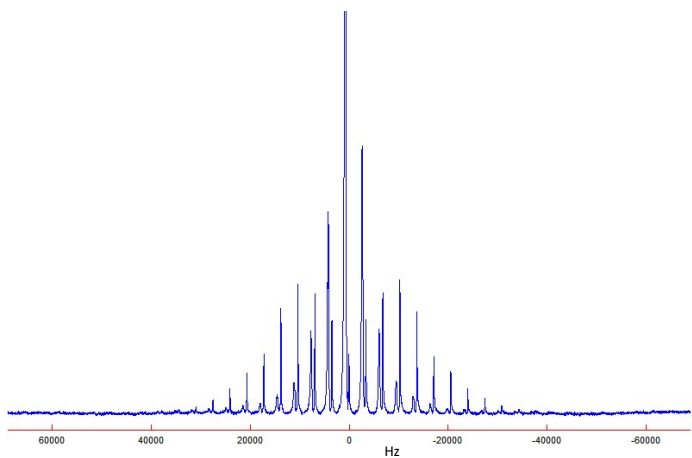

Figure S10:  $^2\text{H}$  MAS spectrum of  $\text{BaSnD}_{4/3-x}$  recorded with a spinning frequency of 3.4 kHz. The central line is vertically cut for better visibility of sideband intensities..

## References

- (1) Lähteenmäki, U.; Niemelä, L.; Pyykkö, P. Deuteron magnetic resonance in solid and liquid  $\text{SiD}_4$  above 36 K. *Phys. Lett. A* **1967**, *25*, 460–461, DOI: 10.1016/0375-9601(67)90080-1.
- (2) Brockway, L. O.; Beach, J. Y. The Electron Diffraction Investigation of the Molecular Structures of (1) Phosphorus Oxytrichloride, Oxydichlorofluoride, Oxychlorodifluoride, Oxytrifluoride, Fluorodichloride, Pentafluoride, and Trifluorodichloride, and of (2) Disilane, Trichlorosilane, and Hexachlorodisilane. *J. Am. Chem. Soc.* **1938**, *60*, 1836–1846, DOI: 10.1021/ja01275a036.
- (3) Beagley, B.; Conrad, A.; Freeman, J.; Monaghan, J.; Norton, B.; Holywell, G. Electron diffraction studies of the hydrides  $\text{Si}_2\text{H}_6$  and  $\text{P}_2\text{H}_4$ . *J. Mol. Struct.* **1972**, *11*, 371–380, DOI: 10.1016/0022-2860(72)85004-x.
- (4) Ader, R.; Loewenstein, A. N.M.R. study of methylsilane-d3 dissolved in a nematic liquid crystal. *Mol. Phys.* **1974**, *27*, 1113–1116, DOI: 10.1080/00268977400100991.
- (5) Fung, B.-M.; Wei, I. Y. Proton and deuteron magnetic resonance of phenylsilane-d3, phenylphosphine-d2, and benzenethiol-d in liquid crystal solutions. *J. Am. Chem. Soc.* **1970**, *92*, 1497–1501, DOI: 10.1021/ja00709a009.
- (6) Nedumkandathil, R.; Jaworski, A.; Fischer, A.; Österberg, C.; Lin, Y.-C.; Karlsson, M.; Grins, J.; Pell, A. J.; Edén, M.; Häussermann, U. Investigation of the Order-Disorder Rotator Phase Transition in  $\text{KSiH}_3$  and  $\text{RbSiH}_3$ . *J. Phys. Chem. C* **2017**, *121*, 5241–5252, DOI: 10.1021/acs.jpcc.6b12902.
- (7) Tang, W. S.; Chotard, J.-N.; Raybaud, P.; Janot, R. Enthalpy-Entropy Compensation Effect in Hydrogen Storage Materials: The Striking Example of Alkali Silanides  $\text{MSiH}_3$  ( $M = \text{K}, \text{Rb}, \text{Cs}$ ). *J. Phys. Chem. C* **2014**, *118*, 3409–3419, DOI: 10.1021/jp411314w.
- (8) Hovi, V.; Lähteenmäki, U.; Tuulensuu, R. Deuteron spin-lattice relaxation and phase transitions in  $\text{GeD}_4$ . *Phys. Lett. A* **1969**, *29*, 520–521, DOI: 10.1016/0375-9601(69)90411-3.

- (9) Maley, I. J.; Brown, D. H.; Ibberson, R. M.; Pulham, C. R. Solid-state structures of the covalent hydrides germane and stannane. *Acta Crystallogr., Sect. B* **2008**, *64*, 312–317, DOI: 10.1107/S0108768108010379.
- (10) Ader, R.; Loewenstein, A. Proton and deuterium magnetic resonance studies of methylsilane and methylgermane dissolved in a nematic liquid crystal. *J. Am. Chem. Soc.* **1974**, *96*, 5336–5340, DOI: 10.1021/ja00824a006.
- (11) Beagley, B.; Monaghan, J. J. Electron diffraction study of digermane. *Trans. Faraday Soc.* **1970**, *66*, 2745, DOI: 10.1039/tf9706602745.
- (12) Niemela, L.; Mäkelä, J. Deuteron spin-lattice relaxation in solid SnD<sub>4</sub>. *Phys. Lett. A* **1973**, *43*, 343–344, DOI: 10.1016/0375-9601(73)90335-6.
- (13) Auer, H.; Guehne, R.; Bertmer, M.; Weber, S.; Wenderoth, P.; Hansen, T. C.; Haase, J.; Kohlmann, H. Hydrides of Alkaline Earth-Tetrel (*AeTt*) Zintl Phases: Covalent *Tt*-H Bonds from Silicon to Tin. *Inorg. Chem.* **2017**, *56*, 1061–1071, DOI: 10.1021/acs.inorgchem.6b01944, PMID: 28098994.
